# Supplementary material for: Nanoparticles modulate surfactant protein A and D mediated protection against influenza A infection in vitro
Source: PubMed Central journal article supplement (PMC4275912; doi:10.1098/rstb.2014.0049), 2015-02-05
Supplement: rstb20140049supp1.pdf [file rstb20140049supp1.pdf]

## Electronic Supplementary Material

### Nanoparticles modulate Surfactant Protein A and D mediated protection against Influenza A infection *in vitro*.

DOI 10.1098/rstb.2014.0049

Zofi McKenzie, Michaela Kendall, Rose-Marie Mackay, Teresa D. Tetley, Cliff Morgan, Mark Griffiths, Howard W. Clark and Jens Madsen

| Treatment   | NP concentration (cm <sup>2</sup> /mL) |                          |                          |                          |                    |                          |
|-------------|----------------------------------------|--------------------------|--------------------------|--------------------------|--------------------|--------------------------|
|             |                                        | 0                        | 0.0016                   | 0.04                     | 1                  | 5                        |
| A549 cells  | Mean                                   | 100.0                    | 100.4                    | 97.0                     | 98.7               | 100.2                    |
|             | p value                                | -                        | 0.219 <sup>b</sup>       | 0.219 <sup>b</sup>       | 0.219 <sup>b</sup> | 1.000 <sup>b</sup>       |
| U-PS        | Mean                                   | 65.5                     | 73.5                     | 74.1                     | 63.4               | 48.8                     |
|             | p value                                | <b>0.019<sup>a</sup></b> | <b>0.050<sup>b</sup></b> | <b>0.050<sup>b</sup></b> | 0.275 <sup>b</sup> | <b>0.050<sup>b</sup></b> |
| U-PS + SP-A | Mean                                   | 44.7                     | 48.6                     | 44.2                     | 45.3               | 13.9                     |
|             | p value                                | <b>0.014<sup>a</sup></b> | 0.386 <sup>b</sup>       | 0.773 <sup>b</sup>       | 1.000 <sup>b</sup> | <b>0.021<sup>b</sup></b> |
| U-PS + SP-D | Mean                                   | 101.8                    | 108.6                    | 100.3                    | 99.1               | 98.8                     |
|             | p value                                | 0.435 <sup>a</sup>       | 0.275 <sup>b</sup>       | 0.827 <sup>b</sup>       | 0.827 <sup>b</sup> | 0.513 <sup>b</sup>       |
| U-PS + BSA  | Mean                                   | 100.0                    | 98.4                     | 92.7                     | 92.2               | 95.0                     |
|             | p value                                | -                        | 0.487 <sup>b</sup>       | <b>0.037<sup>b</sup></b> | 0.487 <sup>b</sup> | 0.487 <sup>b</sup>       |
| TT1 cells   | Mean                                   | 73.6                     | 67.7                     | 63.8                     | 74.4               | 60.6                     |
|             | p value                                | <b>0.037<sup>a</sup></b> | 0.513 <sup>b</sup>       | 0.513 <sup>b</sup>       | 0.827 <sup>b</sup> | 0.127 <sup>b</sup>       |
| U-PS + SP-A | Mean                                   | 60.1                     | 69.1                     | 78.8                     | 59.7               | 16.3                     |
|             | p value                                | <b>0.037<sup>a</sup></b> | 0.513 <sup>b</sup>       | <b>0.050<sup>b</sup></b> | 0.827 <sup>b</sup> | <b>0.050<sup>b</sup></b> |
| U-PS + SP-D | Mean                                   | 99.7                     | 92.5                     | 94.0                     | 88.1               | 101.7                    |
|             | p value                                | 0.487 <sup>a</sup>       | 0.513 <sup>b</sup>       | 0.827 <sup>b</sup>       | 0.513 <sup>b</sup> | 0.827 <sup>b</sup>       |
| U-PS + BSA  | Mean                                   | 100.0                    | 112.4                    | 105.6                    | 106.3              | 102.0                    |
|             | p value                                | -                        | 0.219 <sup>b</sup>       | 0.219 <sup>b</sup>       | 0.219 <sup>b</sup> | 1.000 <sup>b</sup>       |
| THP-1 cells | Mean                                   | 90.0                     | 97.0                     | 101.5                    | 91.5               | 98.1                     |
|             | p value                                | <b>0.014<sup>a</sup></b> | 0.564 <sup>b</sup>       | 0.149 <sup>b</sup>       | 0.386 <sup>b</sup> | 0.564 <sup>b</sup>       |
| U-PS + SP-A | Mean                                   | 68.4                     | 70.7                     | 75.6                     | 67.1               | 46.4                     |
|             | p value                                | <b>0.014<sup>a</sup></b> | 0.386 <sup>b</sup>       | 0.386 <sup>b</sup>       | 0.773 <sup>b</sup> | <b>0.021<sup>b</sup></b> |
| U-PS + SP-D | Mean                                   | 111.7                    | 109.2                    | 86.2                     | 103.9              | 90.6                     |
|             | p value                                | 0.435 <sup>a</sup>       | 0.827 <sup>b</sup>       | 0.275 <sup>b</sup>       | 0.827 <sup>b</sup> | 0.275 <sup>b</sup>       |
| U-PS + BSA  | Mean                                   | 111.7                    | 109.2                    | 86.2                     | 103.9              | 90.6                     |
|             | p value                                | 0.435 <sup>a</sup>       | 0.827 <sup>b</sup>       | 0.275 <sup>b</sup>       | 0.827 <sup>b</sup> | 0.275 <sup>b</sup>       |

**Table S1: Relative Infection following influenza pre-incubation with U-PS and proteins.** <sup>a</sup>p values determined using Mann-Whitney U test versus protein free control; <sup>b</sup>p values determined using Mann-Whitney U test versus nanoparticle free protein containing control.

| Treatment          |         | NP concentration (cm <sup>2</sup> /mL) |                           |                           |                    |                           |
|--------------------|---------|----------------------------------------|---------------------------|---------------------------|--------------------|---------------------------|
| A549 cells         |         | 0                                      | 0.0016                    | 0.04                      | 1                  | 5                         |
| A-PS               | Mean    | 100.0                                  | 98.0                      | 96.0                      | 92.6               | 66.8                      |
|                    | p value | -                                      | 1.000 <sup>b</sup>        | 0.219 <sup>b</sup>        | 0.219 <sup>b</sup> | <b>0.014</b> <sup>b</sup> |
| A-PS + SP-A        | Mean    | 53.3                                   | 52.5                      | 53.6                      | 60.6               | 46.8                      |
|                    | p value | <b>0.019</b> <sup>a</sup>              | 0.513 <sup>b</sup>        | 0.827 <sup>b</sup>        | 0.513 <sup>b</sup> | 0.513 <sup>b</sup>        |
| A-PS + SP-D        | Mean    | 37.6                                   | 45.7                      | 42.5                      | 42.5               | 33.3                      |
|                    | p value | <b>0.019</b> <sup>a</sup>              | <b>0.043</b> <sup>b</sup> | 0.248 <sup>b</sup>        | 0.248 <sup>b</sup> | 0.248 <sup>b</sup>        |
| A-PS + BSA         | Mean    | 101.1                                  | 110.1                     | 102.9                     | 101.5              | 82.0                      |
|                    | p value | 0.219 <sup>a</sup>                     | 0.513 <sup>b</sup>        | 0.827 <sup>b</sup>        | 0.827 <sup>b</sup> | 0.275 <sup>b</sup>        |
| <b>TT1 cells</b>   |         |                                        |                           |                           |                    |                           |
| A-PS               | Mean    | 100.0                                  | 102.5                     | 101.2                     | 102.5              | 80.2                      |
|                    | p value | -                                      | 0.577 <sup>b</sup>        | 0.095 <sup>b</sup>        | 0.577 <sup>b</sup> | <b>0.005</b> <sup>b</sup> |
| A-PS + SP-A        | Mean    | 63.0                                   | 69.0                      | 74.0                      | 69.7               | 57.3                      |
|                    | p value | <b>0.007</b> <sup>a</sup>              | 0.248 <sup>b</sup>        | <b>0.021</b> <sup>b</sup> | 0.386 <sup>b</sup> | 0.386 <sup>b</sup>        |
| A-PS + SP-D        | Mean    | 60.9                                   | 54.0                      | 55.2                      | 55.5               | 46.6                      |
|                    | p value | <b>0.016</b> <sup>a</sup>              | 0.251 <sup>b</sup>        | 0.602 <sup>b</sup>        | 0.465 <sup>b</sup> | 0.076 <sup>b</sup>        |
| A-PS + BSA         | Mean    | 96.6                                   | 105.2                     | 101.7                     | 97.9               | 89.0                      |
|                    | p value | 0.180 <sup>a</sup>                     | 0.117 <sup>b</sup>        | 0.465 <sup>b</sup>        | 0.917 <sup>b</sup> | 0.602 <sup>b</sup>        |
| <b>THP-1 cells</b> |         |                                        |                           |                           |                    |                           |
| A-PS               | Mean    | 100.0                                  | 101.4                     | 99.9                      | 101.9              | 96.2                      |
|                    | p value | -                                      | 0.219 <sup>b</sup>        | 1.000 <sup>b</sup>        | 1.000 <sup>b</sup> | 0.219 <sup>b</sup>        |
| A-PS + SP-A        | Mean    | 72.0                                   | 80.2                      | 72.1                      | 68.5               | 74.4                      |
|                    | p value | <b>0.019</b> <sup>a</sup>              | 0.127 <sup>b</sup>        | 0.827 <sup>b</sup>        | 0.827 <sup>b</sup> | 0.827 <sup>b</sup>        |
| A-PS + SP-D        | Mean    | 63.1                                   | 69.4                      | 60.5                      | 64.3               | 64.1                      |
|                    | p value | <b>0.014</b> <sup>a</sup>              | 0.386 <sup>b</sup>        | 0.885 <sup>b</sup>        | 1.000 <sup>b</sup> | 0.885 <sup>b</sup>        |
| A-PS + BSA         | Mean    | 102.0                                  | 108.2                     | 103.5                     | 84.2               | 100.6                     |
|                    | p value | 0.435 <sup>a</sup>                     | 0.513 <sup>b</sup>        | 0.827 <sup>b</sup>        | 0.513 <sup>b</sup> | 0.513 <sup>b</sup>        |

**Table S2: Relative Infection following influenza pre-incubation with A-PS and proteins.** <sup>a</sup>p values determined using Mann-Whitney U test versus protein free control; <sup>b</sup>p values determined using Mann-Whitney U test versus nanoparticle free protein containing control. Significant values in bold.

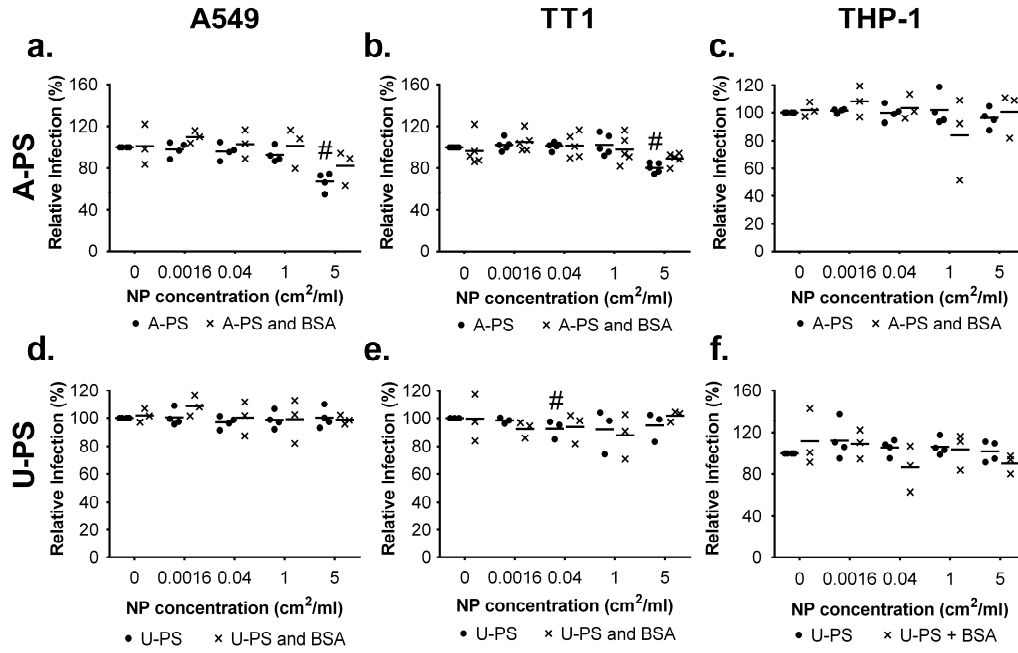

**Figure S1: Effect of 100 nm A-PS and U-PS with BSA on influenza A infection.**

A-PS were pre-incubated with 5  $\mu\text{g}/\text{mL}$  BSA prior to incubation with IAV and treatment of **A.** A549, **B.** TT1 and **C.** differentiated THP-1 cells. U-PS particles were pre-incubated with 5  $\mu\text{g}/\text{mL}$  BSA prior to incubation with IAV and treatment of **D.** A549 **E.** TT1 and **F.** THP-1 cells. Horizontal line represents mean of at least three independent experiments conducted in duplicate. Statistics determined using Mann-Whitney U test where \* $p \leq 0.050$  compared to relative infection in particle free protein control; # $p \leq 0.050$  versus IAV alone.
